# Supplementary material
Source: Springer Nature journal article supplement (https://www.springermedizin.de/resource/supplementary/12936_2009_1048_MOESM2_ESM.pdf/9548862)

Year 2000

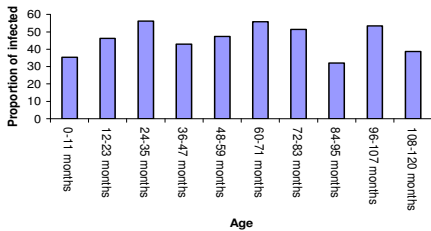

Year 2001

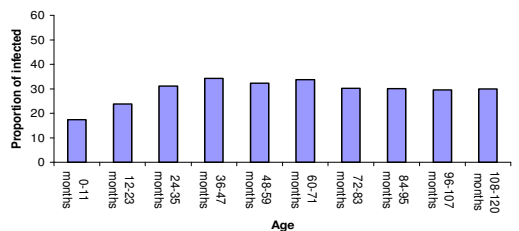

Year 2002

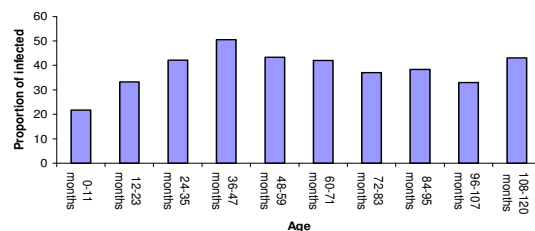

Year 2003

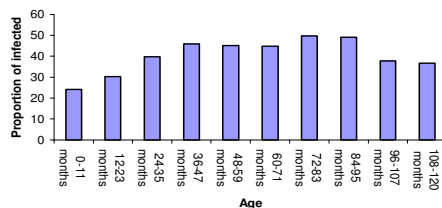

Year 2004

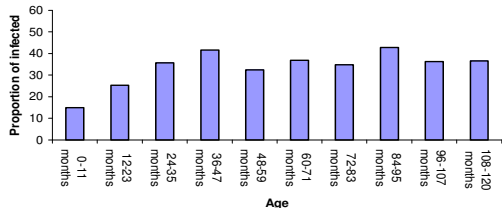

Year 2005

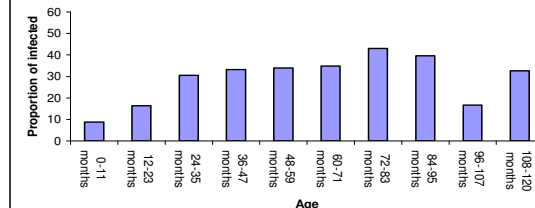

Year 2006

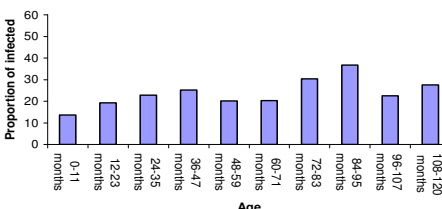

Year 2007

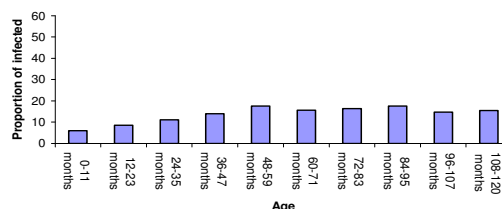

Year 2008

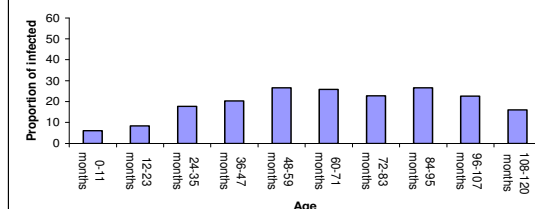

Supplement: MOESM2 [file 9548862]
